# Supplementary material
Source: publisher site journal article supplement (https://www.dovepress.com/article/485142)
Supplement: Supplementary file 1 [file get_supplementary_file.php]

**Supplementary Figure 1**

**Supplementary Figure 1**:Statistics of survival quantity (5 days) in the CT group and the LPS subgroups;***p*<0.01, labeled as ns when *p*>0.05.Data are expressed as mean ± SEM. n=6/group.
